# Supplementary material for: Hierarchical heterostructures of Bi2MoO6 microflowers decorated with Ag2CO3 nanoparticles for efficient visible-light-driven photocatalytic removal of toxic pollutants
Source: publisher site journal article supplement (doi:10.3762/bjnano.9.214), 2018-08-27
Supplement: Additional file 1 [file 2190-4286-9-214-S1.pdf]

# Supporting Information

for

## **Hierarchical heterostructures of Bi<sub>2</sub>MoO<sub>6</sub> microflowers decorated with Ag<sub>2</sub>CO<sub>3</sub> nanoparticles for efficient visible-light-driven photocatalytic removal of toxic pollutants**

Shijie Li\*<sup>1</sup>, Wei Jiang<sup>1</sup>, Shiwei Hu<sup>1</sup>, Yu Liu<sup>1</sup>, Yanping Liu<sup>2</sup>, Kaibing Xu\*<sup>3</sup> and Jianshe Liu<sup>4</sup>

Address: <sup>1</sup>Key Laboratory of key technical factors in Zhejiang seafood health hazards Institute of Innovation & Application, Zhejiang Ocean University, Zhoushan, Zhejiang Province, 316022, China; <sup>2</sup>Department of Environmental Engineering, Zhejiang Ocean University, Zhoushan, Zhejiang Province, 316022, China; <sup>3</sup>State Key Laboratory for Modification of Chemical Fibers and Polymer Materials, Research Center for Analysis and Measurement, Donghua University, Shanghai, 201620, China and <sup>4</sup>State Environmental Protection Engineering Center for Pollution Treatment and Control in Textile Industry, College of Environmental Science and Engineering, Donghua University, Shanghai 201620, China

Email: Shijie Li - lishijie@zjou.edu.cn; Kaibing Xu- xukaibing@dhu.edu.cn

\* Corresponding author

### **Additional experimental data**

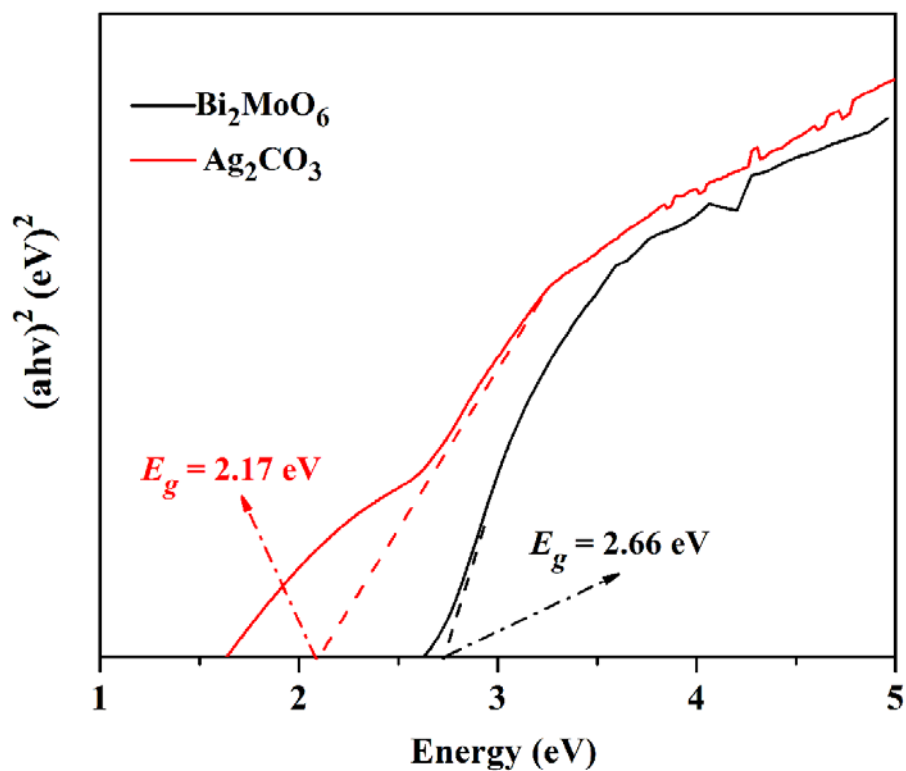

Figure S1: Tauc plots of  $\text{Ag}_2\text{CO}_3$  and  $\text{Bi}_2\text{MoO}_6$ .

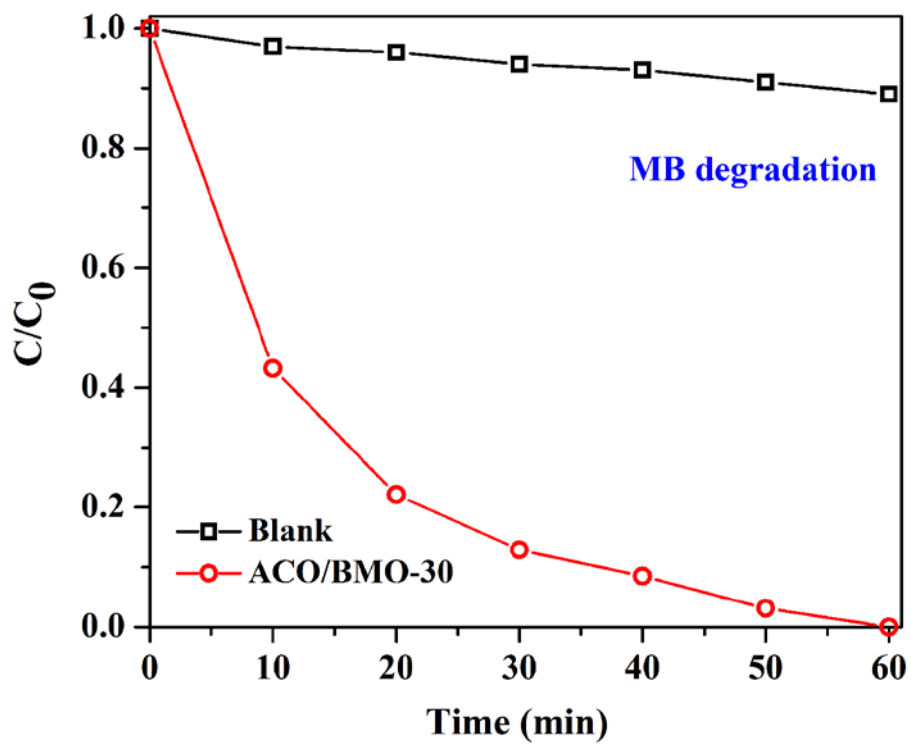

Figure S2: The photocatalytic degradation of MB over ACO/BMO-30.

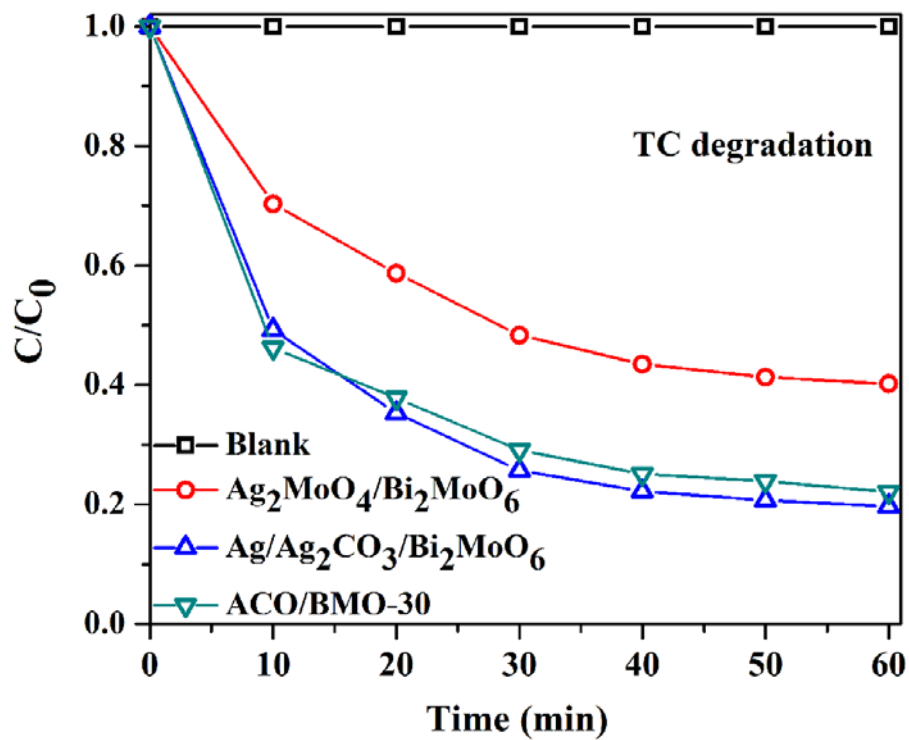

**Figure S3:** Photocatalytic degradation of TC (100 mL, 20 mg·L<sup>-1</sup>) over ACO/BMO-30, Ag/Ag<sub>2</sub>CO<sub>3</sub>/Bi<sub>2</sub>MoO<sub>6</sub>, and Ag<sub>2</sub>MoO<sub>4</sub>/Bi<sub>2</sub>MoO<sub>6</sub>.

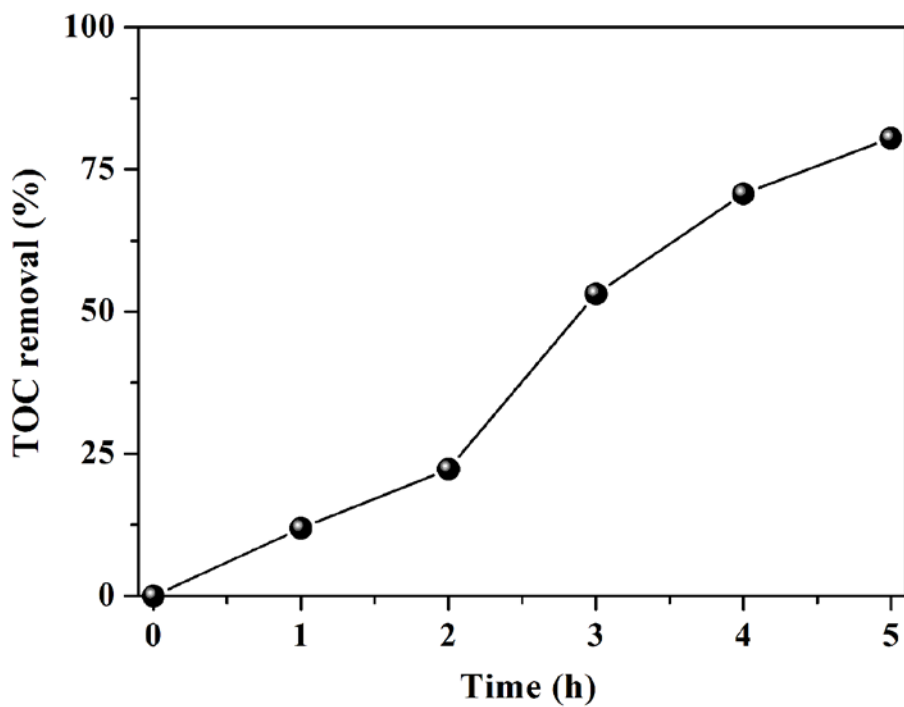

**Figure S4:** TOC removal during the photocatalytic reaction.

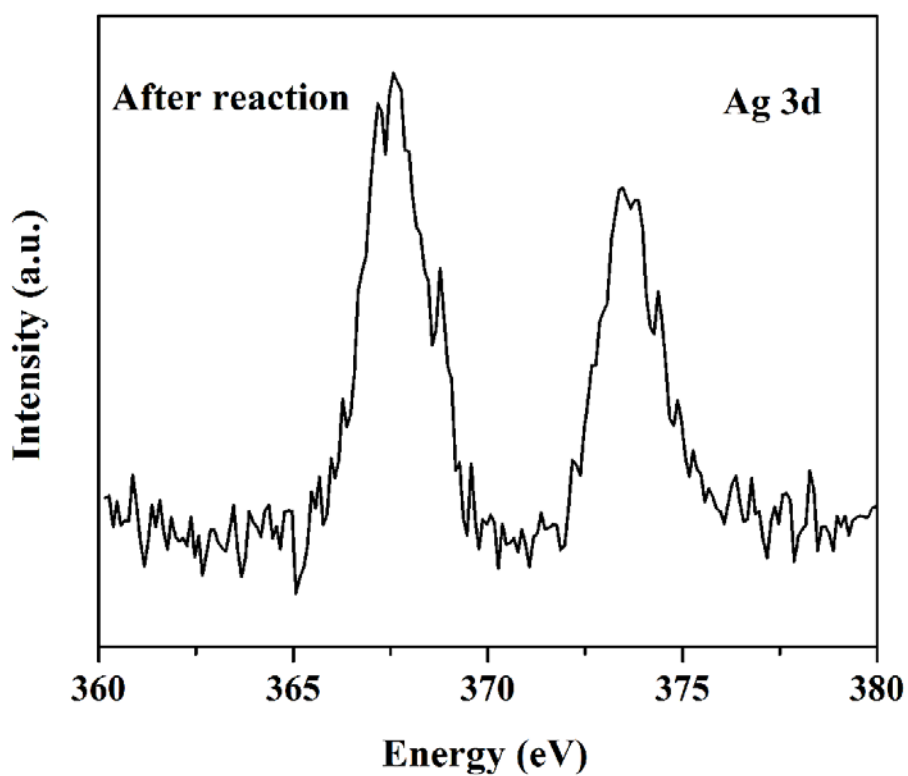

**Figure S5:** High-resolution XPS spectra of Ag 3d for ACO/BMO-30 after photocatalytic reaction.
